# Supplementary material for: An emergency communication system based on software-defined radio
Source: Springer Nature journal article supplement (doi:10.1186/1687-1499-2014-169), 2014-10-18

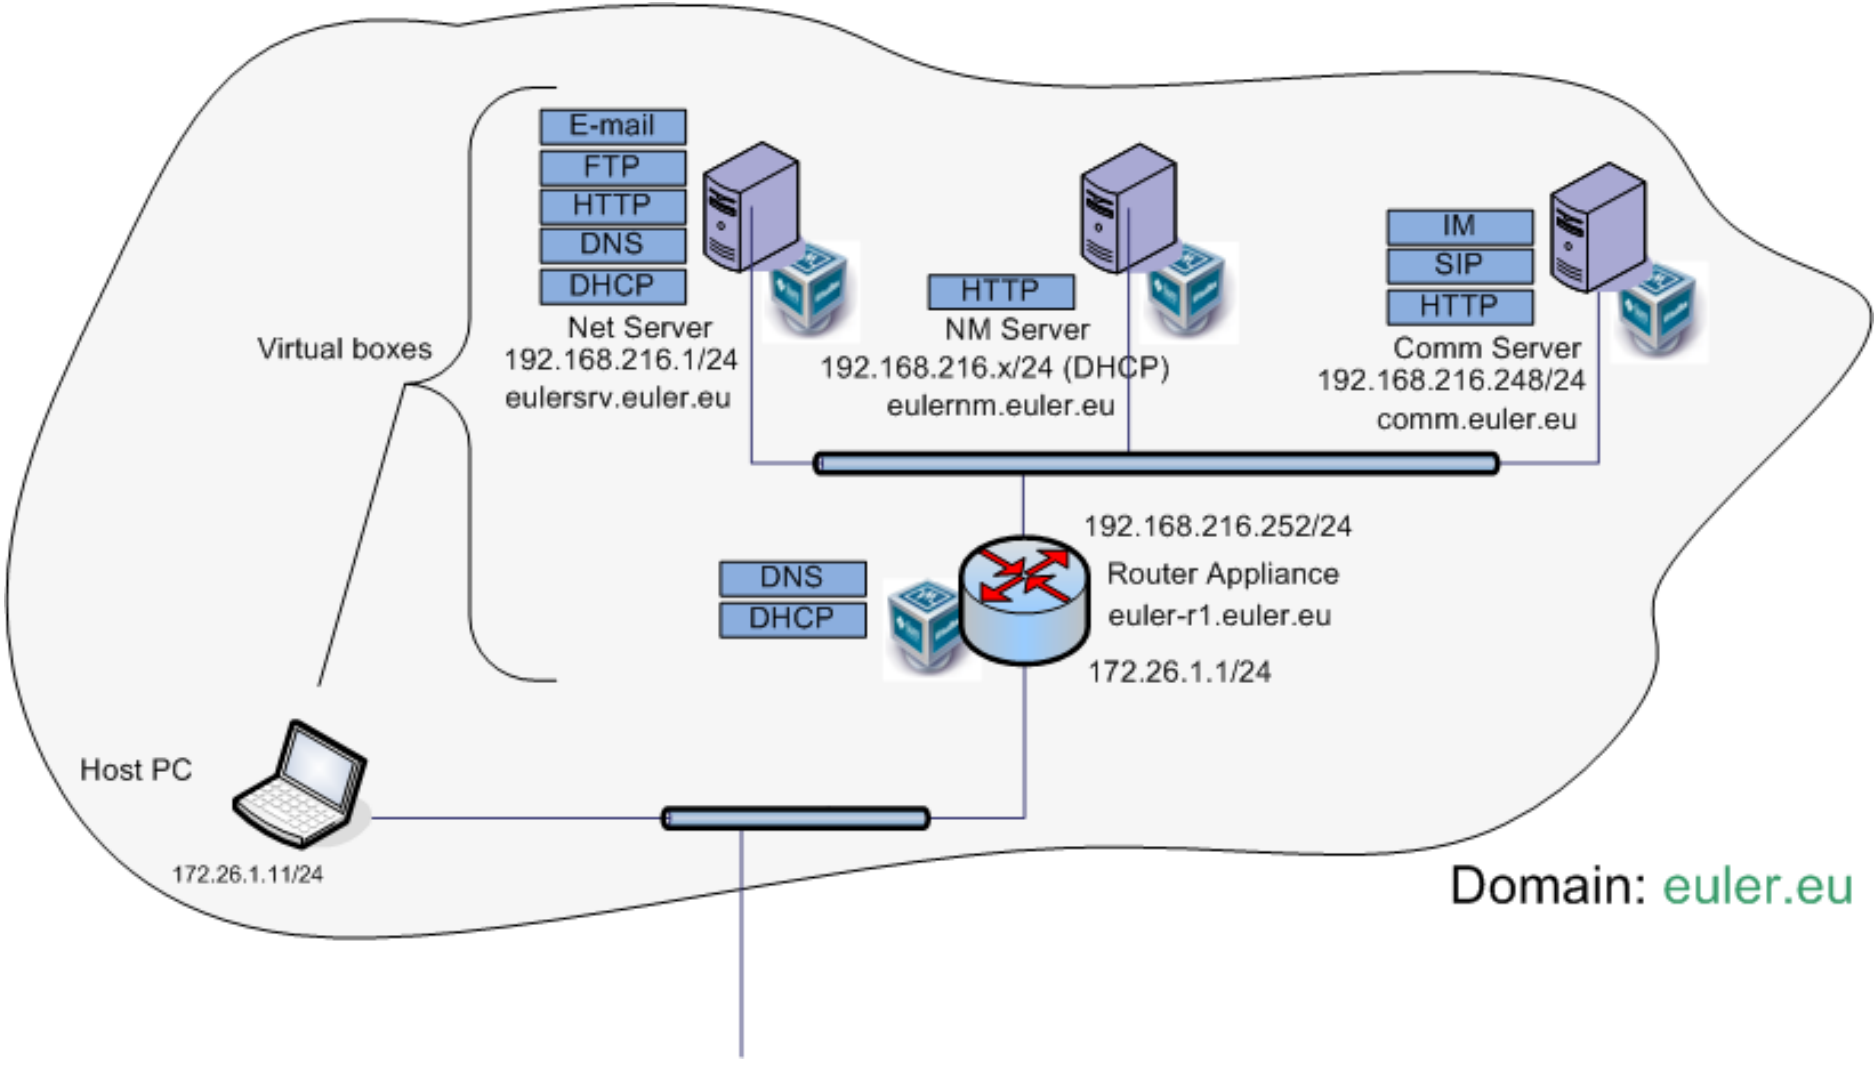

Supplement: 13638_2014_994_MOESM11_ESM.pdf [file 13638_2014_994_MOESM11_ESM.pdf]
